# Supplementary material
Source: publisher figshare collection journal article supplement (https://asha.figshare.com/articles/dataset/_/16879558)
Supplement: Supplementary file [file 1]

**Supplemental Material S1.** Sample descriptives by group.

| Characteristic                    | Students with at least one<br>S-AAE Form in Writing |                 |                | Students with no S-AAE<br>Forms in Writing |                |                | Full Sample |                 |                |        |
|-----------------------------------|-----------------------------------------------------|-----------------|----------------|--------------------------------------------|----------------|----------------|-------------|-----------------|----------------|--------|
|                                   | <i>n</i>                                            | <i>M (SD)</i>   | <i>Min–Max</i> | <i>n</i>                                   | <i>M (SD)</i>  | <i>Min–Max</i> | <i>n</i>    | <i>M (SD)</i>   | <i>Min–Max</i> |        |
| M-Neutral Forms                   | 150                                                 | 12.44 (9.91)    | 0–55           | 57                                         | 6.67 (5.42)    | 0–27           | 207         | 10.85 (9.25)    | 0–55           |        |
| Age (years)                       | 150                                                 | 11.65 (2.30)    | 6.75–15.00     | 57                                         | 11.10 (2.58)   | 6.75–15.33     | 207         | 11.49 (2.39)    | 6.75–15.33     |        |
| Income <sup>1</sup>               | 139                                                 | 3.53 (2.16)     | 1–9            | 55                                         | 3.40 (1.94)    | 1–8            | 194         | 3.49 (2.09)     | 1–9            |        |
| <i>Language Sampling Measures</i> |                                                     |                 |                |                                            |                |                |             |                 |                |        |
| TNU                               | 150                                                 | 19.61 (14.60)   | 1–104          | 57                                         | 11.63 (7.64)   | 1–36           | 207         | 17.41 (13.52)   | 1–104          |        |
| MLTU (morphemes)                  | 150                                                 | 9.27 (2.54)     | 4.33–22        | 57                                         | 9.54 (3.96)    | 4.2–30         | 207         | 9.35 (2.99)     | 4.2–30         |        |
| NDW                               | 150                                                 | 83.51 (45.60)   | 10–267         | 57                                         | 54.67 (30.09)  | 11–120         | 207         | 75.57 (43.78)   | 10–267         |        |
| NTW                               | 150                                                 | 162.39 (111.17) | 13–753         | 57                                         | 96.96 (62.66)  | 12–273         | 207         | 144.37 (104.23) | 12–753         |        |
| <i>Achievement Measures</i>       |                                                     |                 |                |                                            |                |                |             |                 |                |        |
| GMRT-4                            | 143                                                 | 517.27 (50.96)  | 350–653        | 56                                         | 518.84 (51.68) | 387–653        | 199         | 517.71 (51.04)  | 350–653        |        |
| FCAT                              | 81                                                  | 221.38 (24.42)  | 153–272        | 23                                         | 224.74 (19.94) | 177–252        | 104         | 222.13 (23.46)  | 153–272        |        |
| FAIR1                             | Reading Comp                                        | 73              | 93.92 (12.83)  | 72–131                                     | 22             | 96.50 (10.67)  | 78–117      | 95              | 94.52 (12.36)  | 72–131 |
|                                   | Maze                                                | 72              | 94.28 (13.72)  | 71–131                                     | 22             | 94.18 (12.89)  | 71–122      | 94              | 94.26 (13.46)  | 71–131 |
| FAIR2                             | Word Analysis                                       | 72              | 96.69 (15.86)  | 60–127                                     | 21             | 96.43 (10.51)  | 81–118      | 93              | 96.63 (14.77)  | 60–127 |
|                                   | Reading Comp                                        | 70              | 96.33 (13.24)  | 69–144                                     | 22             | 94.50 (11.95)  | 72–112      | 92              | 95.89 (12.90)  | 69–144 |
| FAIR3                             | Maze                                                | 68              | 99.72 (15.28)  | 74–140                                     | 21             | 100.19 (13.78) | 77–131      | 89              | 99.83 (14.86)  | 74–140 |
|                                   | Word Analysis                                       | 68              | 95.82 (15.81)  | 63–133                                     | 20             | 94.70 (15.25)  | 66–129      | 88              | 95.57 (15.60)  | 63–133 |
| FAIR3                             | Reading Comp                                        | 66              | 99.86 (15.67)  | 73–155                                     | 21             | 100.62 (10.21) | 82–116      | 87              | 100.05 (14.49) | 73–155 |
|                                   | Maze                                                | 66              | 101.53 (15.46) | 77–140                                     | 21             | 101.67 (15.43) | 81–131      | 87              | 101.56 (15.36) | 77–140 |
| FAIR3                             | Word Analysis                                       | 64              | 97.36 (15.92)  | 60–138                                     | 20             | 93.35 (10.67)  | 76–114      | 84              | 96.40 (14.88)  | 60–138 |

<sup>1</sup>On a 1-12 scale, with 1 = *less than \$10,000/year* and each 1-unit increase representing \$19,000. S-AAE = African American English-specific morphosyntactic forms; M-Neutral = dialect neutral forms relative to standard written English; TNU = Total number t-units; MLTU = mean length of t-unit in morphemes; NDW = number different words; NTW = number total words; GMRT = Gates-MacGinitie Reading Tests (reading vocabulary), 4th Edition; FCAT = Florida's Comprehensive Assessment Test; FAIR1 = Florida Assessments for Instruction in Reading fall 2012; FAIR2 = FAIR winter 2012; FAIR3 = FAIR spring 2013; RC = reading comprehension; Maze = reading fluency; WA = word analysis.
