# Supplementary material
Source: publisher figshare collection journal article supplement (https://asha.figshare.com/articles/dataset/_/16879558)
Supplement: Supplementary file [file 1]

**Supplemental Material S2.** Standardized factor loadings from factor models.

| <b>Factor</b>                        | <b>Variables</b>     | <b>Factor Loadings</b> | <b><i>SE</i></b> | <b><i>p</i></b> | <b>R<sup>2</sup></b> |
|--------------------------------------|----------------------|------------------------|------------------|-----------------|----------------------|
| AAE-Specific Forms<br>(S-AAE)        | DDMt                 | 1.00                   | —                | —               | 1.00                 |
|                                      | DDMd                 | .99                    | .01              | < .001          | .98                  |
|                                      | DDMw                 | .96                    | .01              | < .001          | .91                  |
| Dialect Neutral Forms<br>(M-Neutral) | Neutral <sub>t</sub> | 1.00                   | .01              | —               | 1.00                 |
|                                      | Neutral <sub>w</sub> | .87                    | .02              | < .001          | .76                  |
|                                      | Neutral <sub>d</sub> | .99                    | .01              | < .001          | .99                  |
| Writing Productivity                 | NTW                  | 1.00                   | —                | —               | 1.00                 |
|                                      | TNU                  | .95                    | .02              | < .001          | .90                  |
|                                      | NDW                  | .97                    | .01              | < .001          | .94                  |
| Spelling                             | WA1                  | .85                    | .05              | < .001          | .72                  |
|                                      | WA2                  | .85                    | .04              | < .001          | .72                  |
|                                      | WA3                  | .81                    | .06              | < .001          | .66                  |
| Fluency                              | M1                   | .88                    | .03              | < .001          | .78                  |
|                                      | M2                   | .93                    | .02              | < .001          | .86                  |
|                                      | M3                   | .93                    | .02              | < .001          | .86                  |
| Reading Comprehension                | RC1                  | .81                    | .05              | < .001          | .66                  |
|                                      | RC2                  | .81                    | .04              | < .001          | .65                  |
|                                      | RC3                  | .83                    | .04              | < .001          | .69                  |
| FAIR                                 | Fluency              | .94                    | .04              | < .001          | .87                  |
|                                      | Spelling             | .80                    | .06              | < .001          | .63                  |
|                                      | Reading              | .88                    | .05              | < .001          | .78                  |
